# Supplementary material for: High-performance light-soaking-free polymer solar cells based on a LiF modified ZnO electron extraction layer
Source: Royal Society of Chemistry journal article supplement (doi:10.1039/c9tc02363a), 2019-01-01
Supplement: c9tc02363a1.pdf [file c9tc02363a1.pdf]

# **High-performance light-soaking-free polymer solar cells based on LiF modified ZnO electron extraction layer**

Zhitian Ling<sup>1</sup>, Yi Zhao<sup>1</sup>, Shuanglong Wang<sup>1</sup>, Saihu Pan<sup>1</sup>, Hong Lian<sup>1</sup>, Cuiyun Peng<sup>1</sup>, Xuyong Yang<sup>1</sup>, Yingjie Liao<sup>1</sup>, Weixia Lan<sup>2,\*</sup>, Bin Wei<sup>2</sup>, Guo Chen<sup>1,\*</sup>

<sup>1</sup>Key Laboratory of Advanced Display and System Applications, Ministry of Education, Shanghai University, Shanghai, 200072, China.

<sup>2</sup>School of Mechatronic Engineering and Automation, Shanghai University, Shanghai, 200072, China.

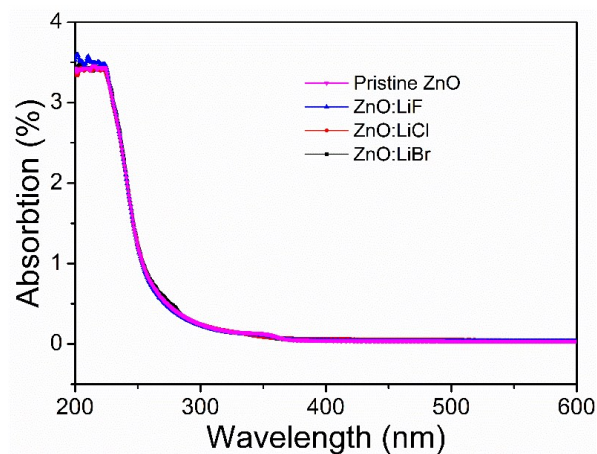

Figure S1. Absorption spectra of pristine and modified ZnO with various alkali metal halides

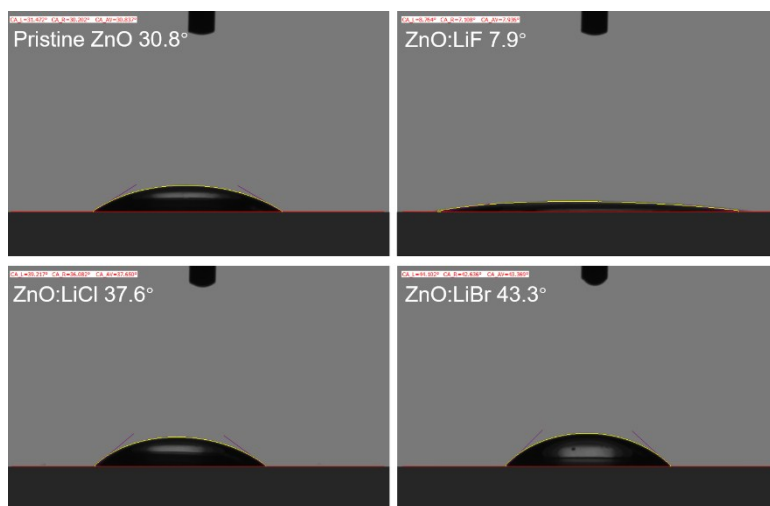

Figure S2. Water contact angle photographs of pristine and modified ZnO films coated on glass substrate.

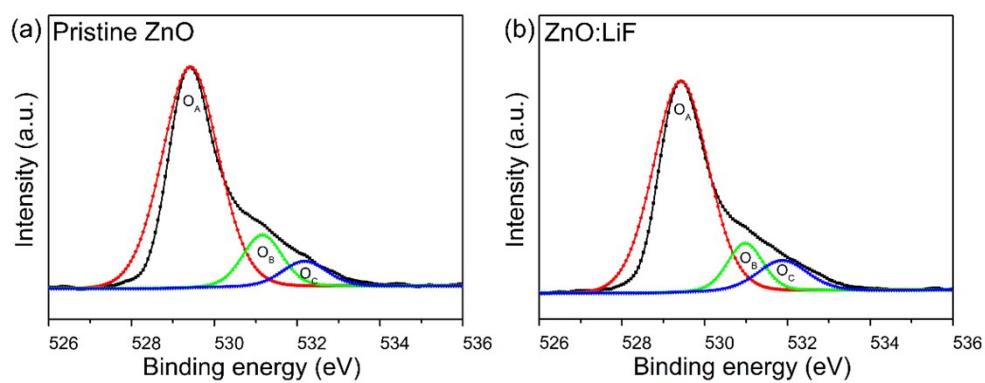

Figure S3. The resolved XPS spectra of the as-prepared (a) pristine ZnO and (b) ZnO:LiF EELs.
